# Supplementary material for: Unveiling the proteome-wide autoreactome enables enhanced evaluation of emerging CAR T cell therapies in autoimmunity
Source: PubMed Central journal article supplement (PMC11213466; doi:10.1172/jci180012), 2024-05-16
Supplement: jci-134-180012-s005.pdf [file jci-134-180012-s005.pdf]

# Supplemental Material

## Supplemental Figures:

### Supplemental Figure 1. Distribution of autoantibodies across healthy individuals

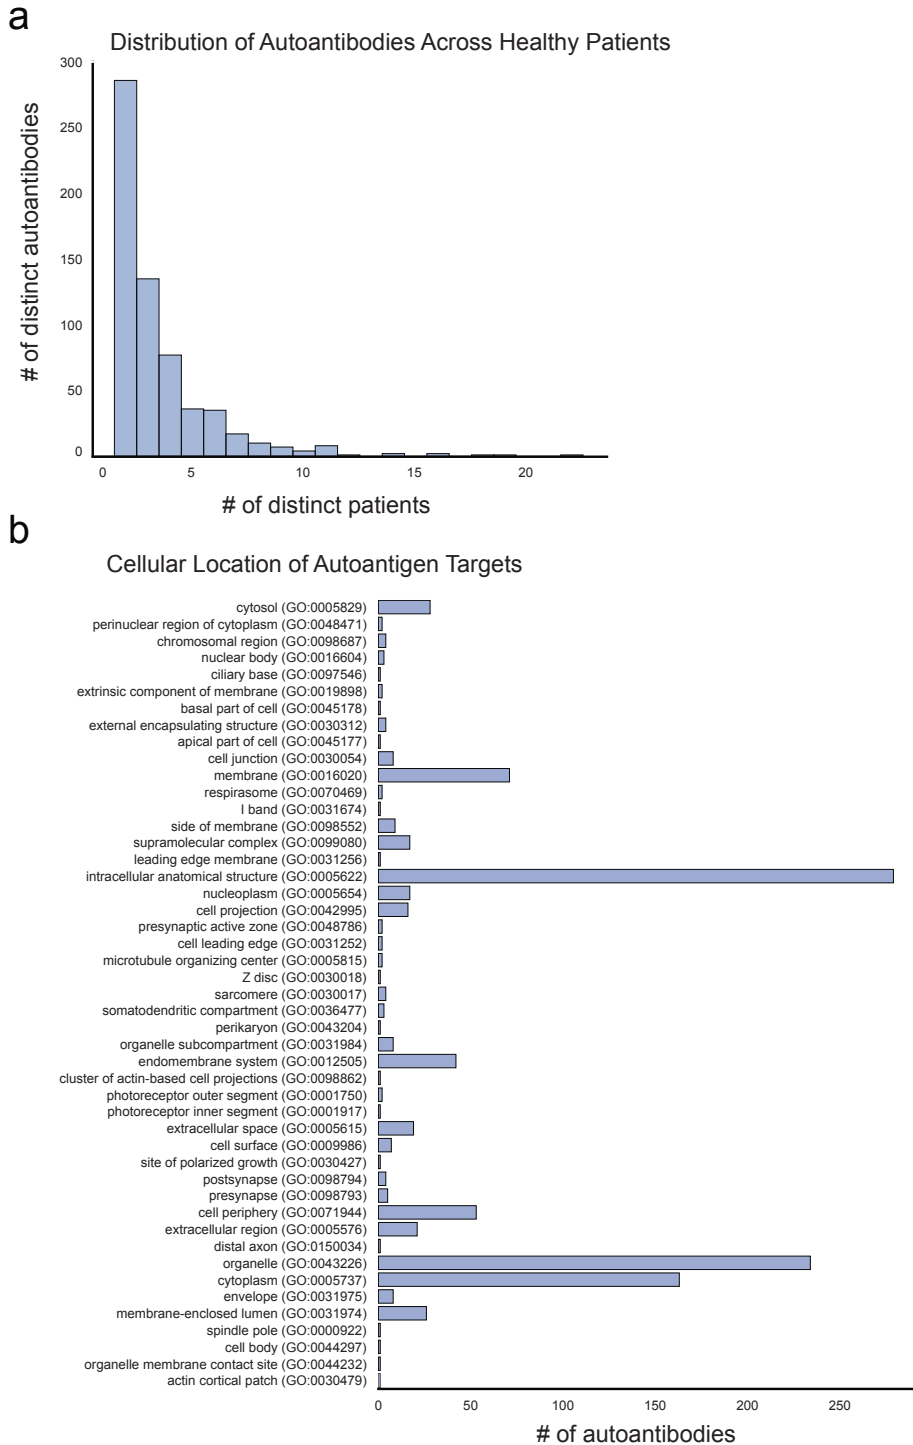

(a) Histogram showing the distribution of highly enriched autoantibodies within any one individual (for each of the 79 healthy individuals in the cohort, the top 10 autoantibodies measured by fold-change over mock-IP were identified, which yielded 623 unique autoantibody targets) across the entire cohort of 79 healthy individuals. (b) Barplot showing the cellular location (cellular anatomical entity (GO:0110165) determined by Panther GO Slim Cellular Component analysis mapped 570 of the 623 total autoantigens) of autoantibody targets.

### Supplemental Figure 2. Administration of IVIG minimally alters the autoreactome

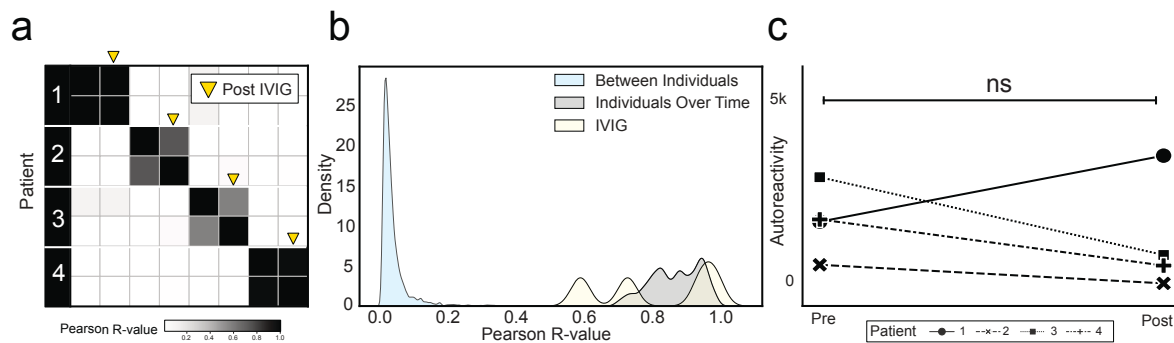

(a) Correlation matrices showing Pearson correlation coefficients of complete PhIP-Seq signal before and after IVIG administration. (b) Kernel density estimate plot showing distribution of Pearson R correlation coefficients from before and after IVIG administration relative to longitudinal samples from individuals over time, and between different individuals. (c) Lineplots showing the autoreactivity (sum of top 10 PhIP-Seq Z-scores relative to the 79 healthy controls) for each patient before and after IVIG administration. Paired-samples Wilcoxon test p-value 0.625.

**Supplemental Figure 3. Changes in disease-causing autoantibody levels following rituximab**

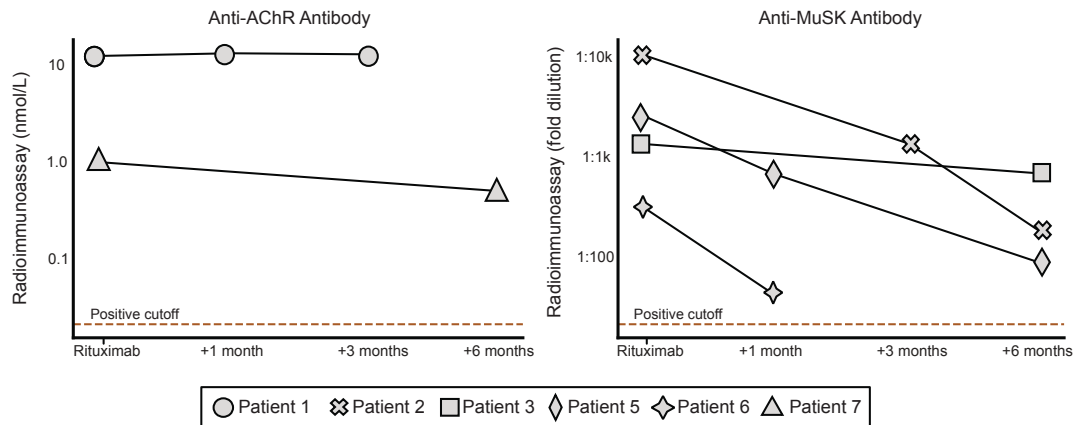

**Left:** Anti-AChR autoantibody levels measured by radioimmunoassay (RIA; Mayo Clinic Laboratory, unit=nmol/L) in 2 patients at 1 month, 3 months, and 6 months post-rituximab. RIA positive cutoff 0.02 nmol/L. **Right:** Anti-MuSK autoantibody titers measured by RIA (Athenia Diagnostics, unit=fold dilution) in a different 4 patients at 1 month, 3 months, and 6 months post-rituximab. Positive cutoff for is a fold dilution of greater than 1:20.

Supplemental Figure 4: CD19 cell counts following anti-CD19 CAR-T treatment

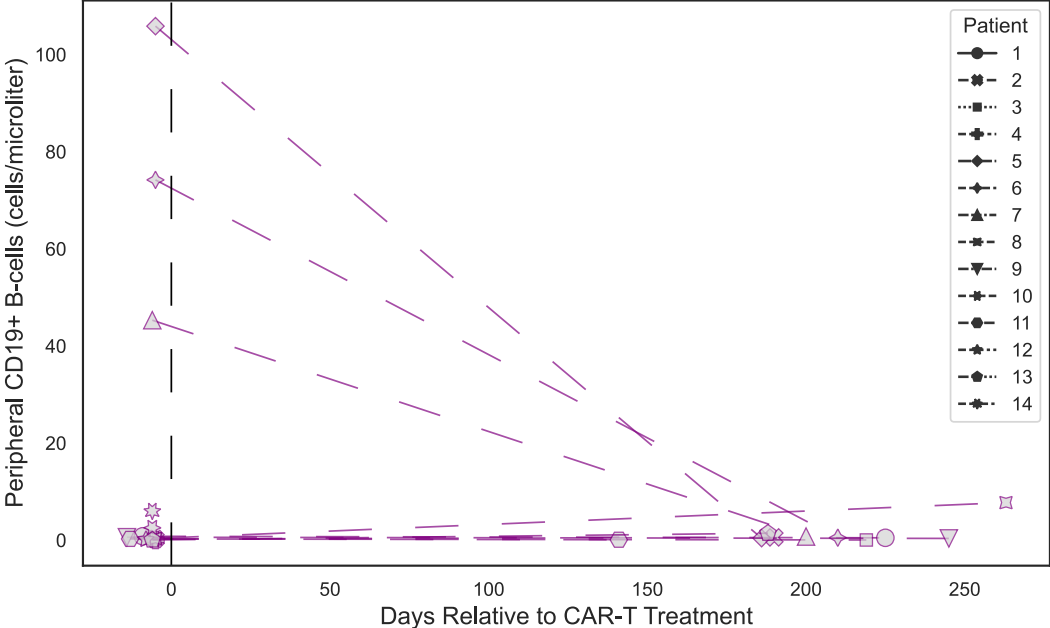

Lineplots showing the levels of CD19<sup>+</sup> B cells in peripheral blood measured by flow cytometry at various timepoints relative to anti-CD19 CAR-T treatment, in each patient.

**Supplemental Figure 5: Changes in multiplex bead-based protein array detected antibody levels following CD19 therapy**

**a**

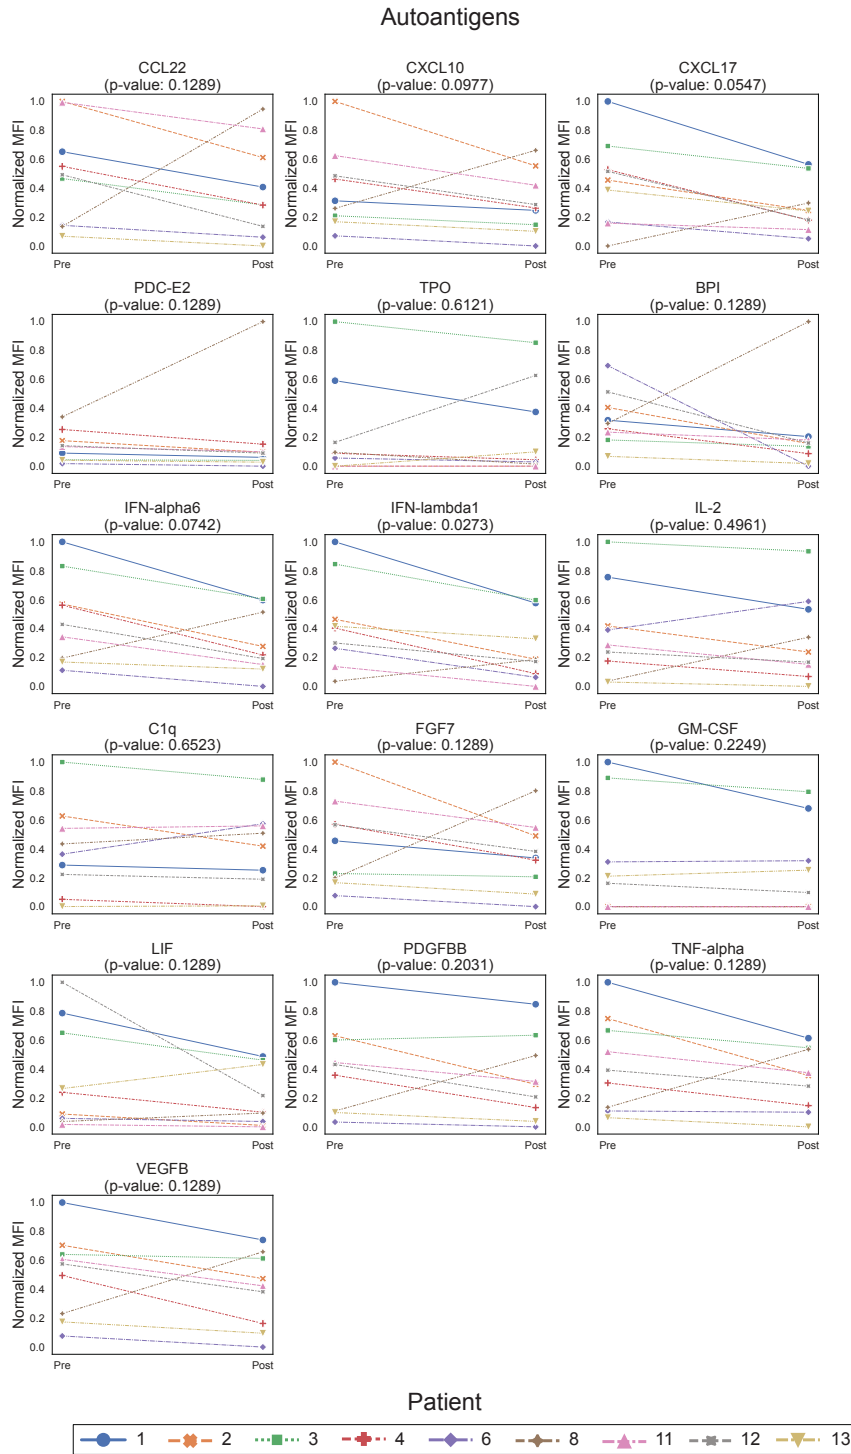

b

Viral Antigens

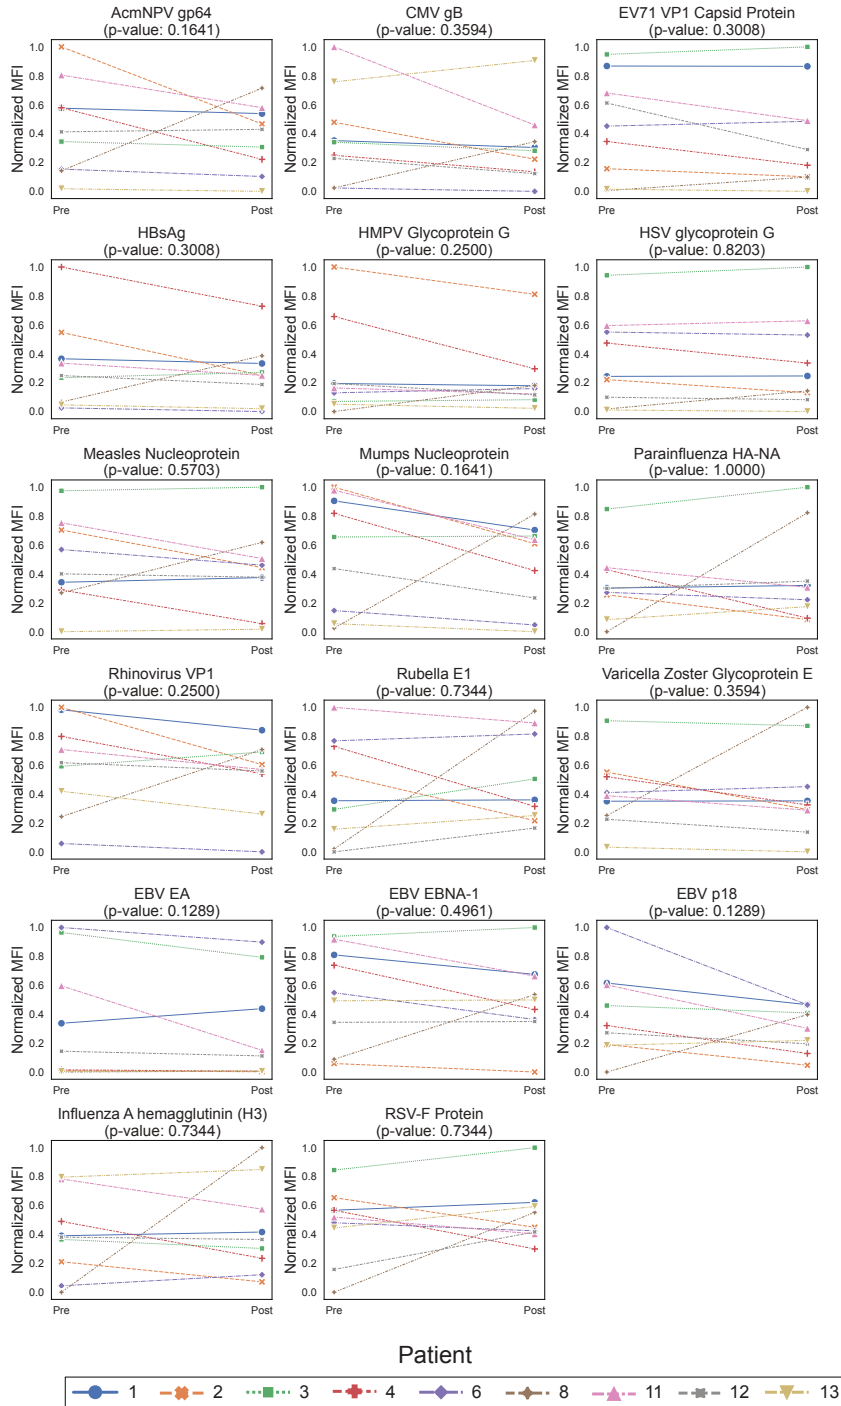

(a) Multiplex bead-based protein array detected normalized MFI values (see “Methods”) for each

of the 16 autoantigens with meaningful signal (see “Methods”) in each of the patients before and approximately 6 months after treatment with anti-CD19 CAR-T cells. P-values shown are from a paired-samples Wilcoxon test. **(b)** Multiplex bead-based protein array detected normalized MFI values (see “Methods”) for each of the 17 viral antigens with meaningful signal (see “Methods”) in each of the patients before and after treatment with anti-CD19 CAR-T cells. P-values shown are from a paired-samples Wilcoxon test.

**Supplemental Figure 6: Changes in bone marrow plasma cell percentage following anti-BCMA CAR-T cell therapy**

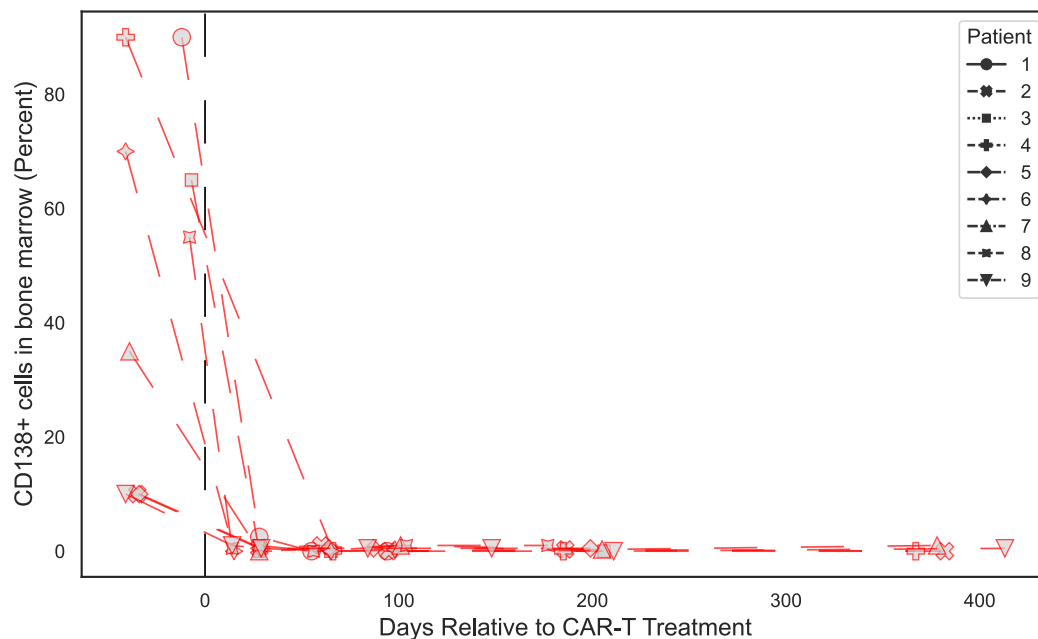

Lineplots showing the levels of plasma cells in the bone marrow measured by flow cytometry at various timepoints relative to anti-BCMA CAR-T treatment, in each patient.

**Supplemental Figure 7: Changes in PhIP-Seq detected autoreactivities following anti-BCMA CAR-T cell therapy without controlling for potential confounding by paraprotein**

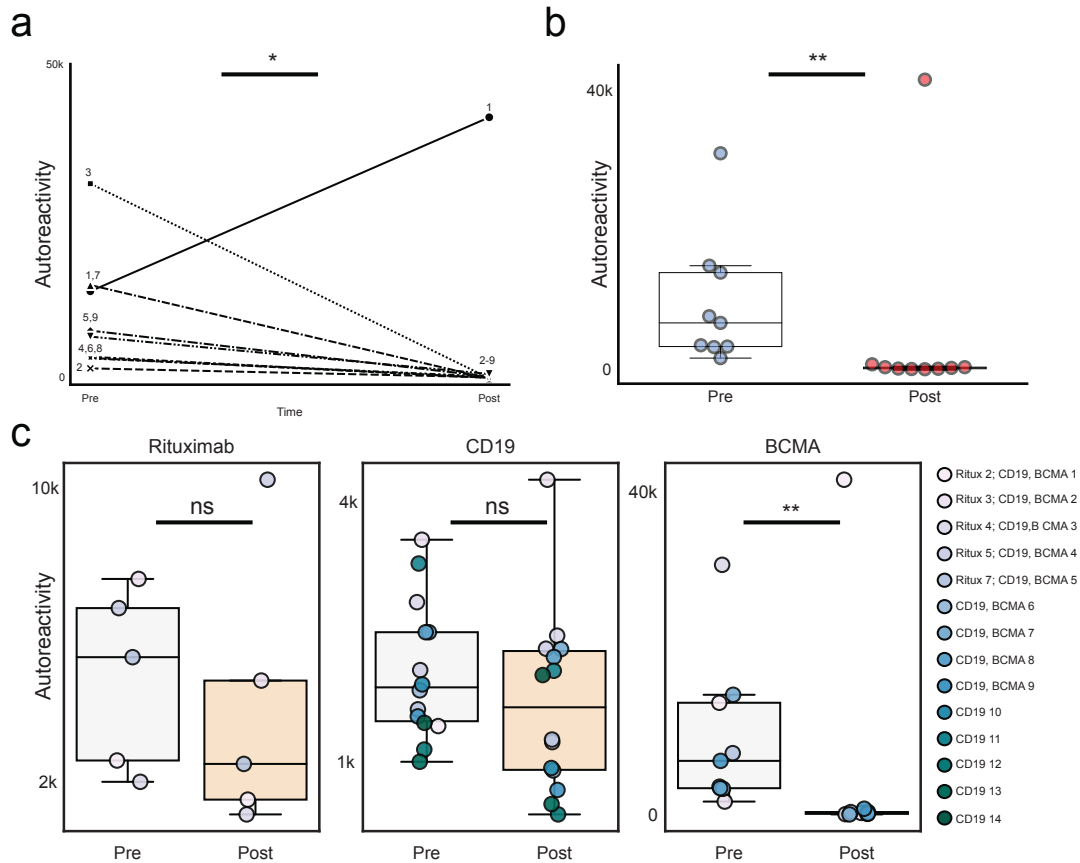

**(a)** Lineplots showing the autoreactivity (sum of top 10 PhIP-Seq Z-scores relative to the 79 healthy controls) for each patient before and after treatment. One-sided paired samples Wilcoxon test p-value=0.049. **(b)** Swarmplots showing the relative distributions of autoreactivity (sum of top 10 PhIP-Seq Z-scores relative to the 79 healthy controls) before and after treatment with anti-BCMA CAR-T. Mann-Whitney U p-value=0.006. **(c)** Boxplots showing the relative distributions of autoreactivity (sum of top 10 PhIP-Seq Z-scores relative to the 79 healthy controls) before and after treatment with rituximab, anti-CD19 CAR-T, and anti-BCMA CAR-T. rituximab treatment cohort Mann-Whitney U p-value=0.42 with a median percent decrease of 52.3%; anti-CD19 CAR-T treatment cohort Mann-Whitney U p-value=0.206 with a median percent decrease of



11.9%; anti-BCMA CAR-T treatment cohort Mann-Whitney U p-value=0.006 with a median percent decrease of 97.2%.

# Supplemental Figure 8: Changes in multiplex bead-based protein array detected antibody levels following BCMA therapy

a

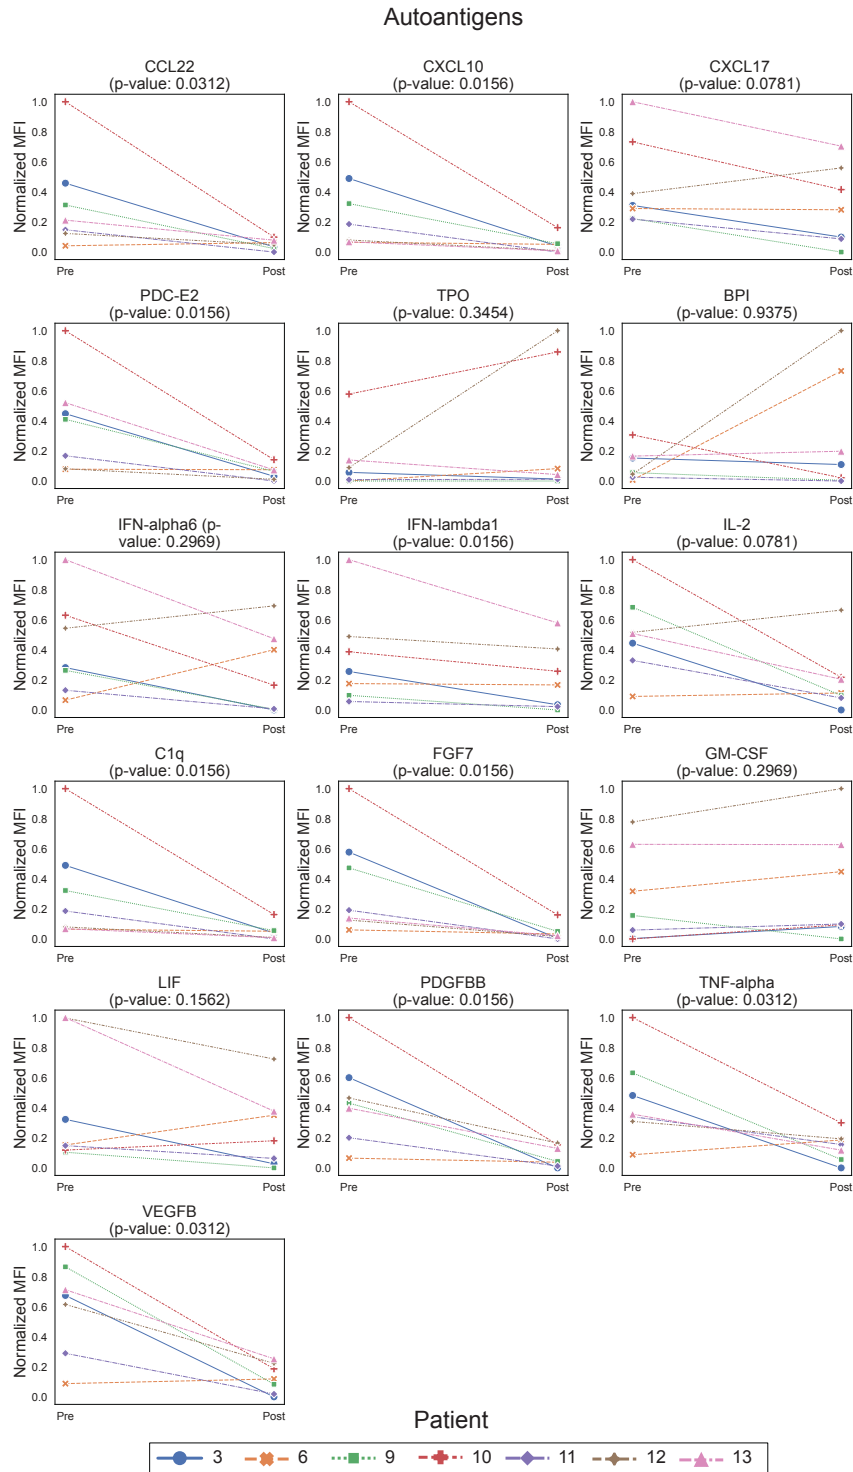

b

Viral Antigens

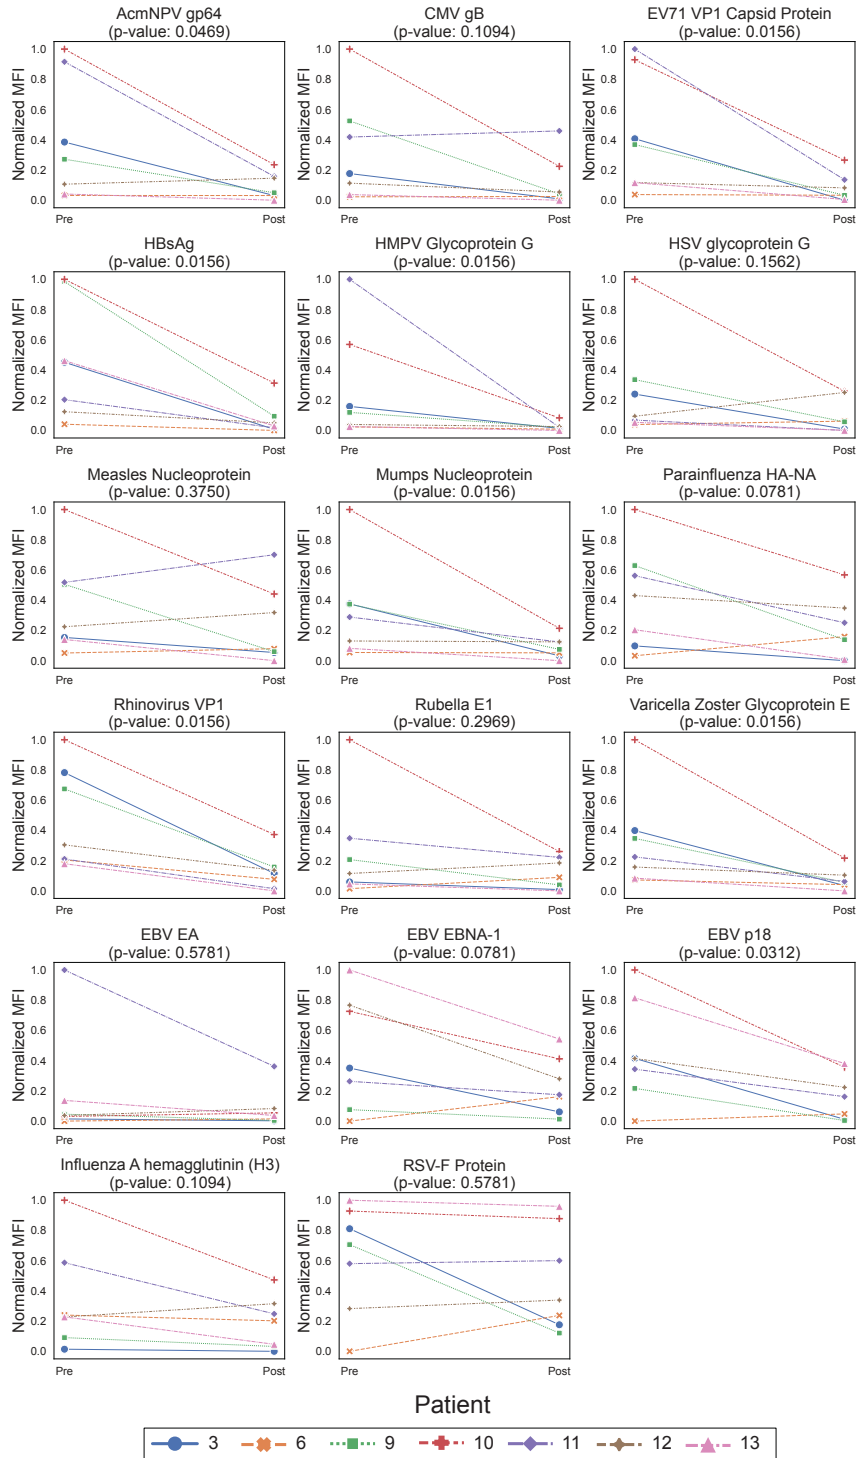

(a) Multiplex bead-based protein array detected normalized MFI values (see “Methods”) for each

of the 16 autoantigens with meaningful signal (see “Methods”) in each of the patients before and after treatment with anti-BCMA CAR-T cells. P-values shown are from a paired-samples Wilcoxon test. **(b)** Multiplex bead-based protein array detected normalized MFI values (see “Methods”) for each of the 17 viral antigens with meaningful signal (see “Methods”) in each of the patients before and after treatment with anti-BCMA CAR-T cells. P-values shown are from a paired-samples Wilcoxon test.

**Supplemental Figure 9: Flow cytometry gating strategy for identification of CD19<sup>+</sup> B cells**

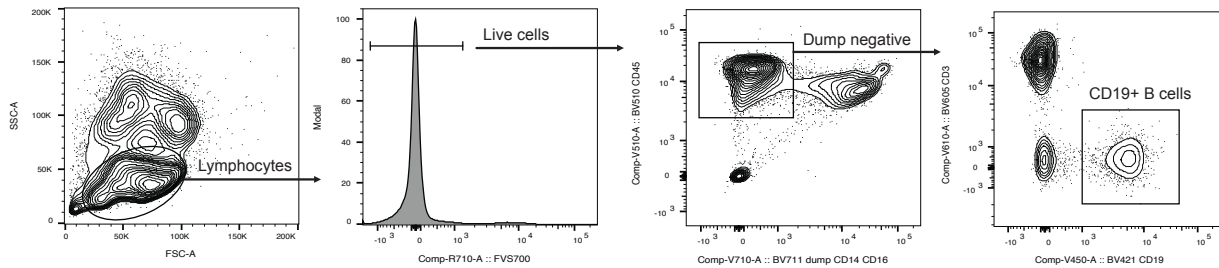

Representative flow cytometry gating for the identification and enumeration of CD19<sup>+</sup> B-cells.

**Supplemental Tables:**

**Supplemental Table 1: PhIP-Seq Cohort Demographics**

|                                  | <b>Healthy</b> | <b>Longitudinal</b> | <b>IVIG</b> | <b>Rituximab</b> | <b>CD19 CAR-T</b> | <b>BCMA CAR-T</b> |
|----------------------------------|----------------|---------------------|-------------|------------------|-------------------|-------------------|
| <b>Number</b>                    | 79             | 7                   | 4           | 7                | 14                | 9                 |
| <b>Male sex (%)</b>              | 41 (51.9)      | 2 (28.6)            | 1 (25)      | 2 (28.6)         | 9(64.3)           | 4 (44.4)          |
| <b>Median age in years (IQR)</b> | 48 (36-55.5)   | 74 (71.5-76.5)      | Ranges*     | Ranges**         | 58 (47-64)        | 65 (60-70)        |

| <b>Race and Ethnicity (%)</b> |           |         |        |          |          |          |
|-------------------------------|-----------|---------|--------|----------|----------|----------|
| <b>White</b>                  | 63 (77.7) | 7 (100) | 3 (75) | 6 (85.7) | 14 (100) | 8 (88.9) |
| <b>Black</b>                  | 1 (1.2)   | 0       | 0      | 1 (14.3) | 0        | 0        |
| <b>Hispanic/Latinx</b>        | 10 (12.3) | 0       | 0      | 0        | 0        | 0        |
| <b>Asian/Pacific Islander</b> | 3 (3.7)   | 0       | 1 (25) | 0        | 0        | 0        |
| <b>Multiple Races</b>         | 3 (3.7)   | 0       | 0      | 0        | 0        | 0        |
| <b>Unknown/Other</b>          | 1 (1.2)   | 0       | 0      | 0        | 0        | 1 (11.1) |

\* Age ranges at time of first sample collection: 26-30 years, n=1; 31-35 years, n=1; 35-40 years, n=1; 51-55 years, n=1.

\*\*Age ranges at time of first sample collection: <20 year old, n=1; 21-25 years, n=1; 35-40 years, n=1; 61-65 years, n=2, 66-70 years, n=2.

### **Supplemental Table 2: Healthy Longitudinal Patient Clinical Details**

| <b>ID</b> | <b>Duration</b> | <b>Autoimmunity</b> | <b>Cancer</b>        | <b>Immunomodulation</b> |
|-----------|-----------------|---------------------|----------------------|-------------------------|
| Patient 1 | 63 months       | None                | None                 | None                    |
| Patient 2 | 25 months       | None                | Basal cell carcinoma | None                    |
| Patient 3 | 75 months       | None                | None                 | None                    |
| Patient 4 | 92 months       | None                | None                 | None                    |
| Patient 5 | 61 months       | Sjögren's Disease   | None                 | None                    |
| Patient 6 | 50 months       | None                | None                 | None                    |
| Patient 7 | 77 months       | None                | None                 | None                    |

**Supplemental Table 3: IVIG Sample Details**

| <b>ID</b>        | <b>Sample Timing</b> | <b>Immunomodulation</b> | <b>Last IVIG Dose</b> |
|------------------|----------------------|-------------------------|-----------------------|
| <b>Patient 1</b> |                      |                         |                       |
|                  | Initial              | None                    | Naïve                 |
|                  | 6 weeks later        | Prednisone/Imuran       | 3 weeks prior         |
| <b>Patient 2</b> |                      |                         |                       |
|                  | Initial              | None                    | Naïve                 |
|                  | 14 weeks later       | Prednisone              | 1 day prior           |
| <b>Patient 3</b> |                      |                         |                       |
|                  | Initial              | Prednisone              | Naïve                 |
|                  | 7 weeks later        | Prednisone              | 2 days prior          |
| <b>Patient 4</b> |                      |                         |                       |
|                  | Initial              | None                    | Naïve                 |
|                  | 21 weeks later       | Prednisone              | 5 weeks prior         |

**Supplemental Table 4: Rituximab Sample Details**

| <b>ID</b>        | <b>Autoantibody</b> | <b>Sample</b> | <b>Immunomodulation</b> | <b>Rituximab</b> |
|------------------|---------------------|---------------|-------------------------|------------------|
| <b>Patient 1</b> | <b>AchR</b>         |               |                         |                  |
|                  |                     | 1             | Prednisone              | Naïve            |
|                  |                     | 2             | Prednisone              | 1.1              |
|                  |                     | 3             | Prednisone              | 3.9              |
|                  |                     | 4             | Prednisone              | 3.4              |

|                  |             |   |            |       |
|------------------|-------------|---|------------|-------|
|                  |             | 5 | Prednisone | 6.1   |
|                  |             | 6 | Prednisone | 24.6  |
| <b>Patient 2</b> | <b>MuSK</b> |   |            |       |
|                  |             | 1 | Prednisone | Naïve |
|                  |             | 2 | Prednisone | 2.3   |
|                  |             | 3 | Prednisone | 5.1   |
|                  |             | 4 | Prednisone | 4.8   |
| <b>Patient 3</b> | <b>MuSK</b> |   |            |       |
|                  |             | 1 | Prednisone | 6.1   |
|                  |             | 2 | Prednisone | 5.1   |
|                  |             | 3 | None       | 68.9  |
| <b>Patient 4</b> | <b>MuSK</b> |   |            |       |
|                  |             | 1 | None       | 8     |
|                  |             | 2 | None       | 7.9   |
|                  |             | 3 | None       | 24.7  |
| <b>Patient 5</b> | <b>MuSK</b> |   |            |       |
|                  |             | 1 | None       | 17.8  |
|                  |             | 2 | None       | 1.3   |
|                  |             | 3 | None       | 8.6   |
|                  |             | 4 | None       | 13.9  |
|                  |             | 5 | None       | 18.8  |
|                  |             | 6 | None       | 21    |
|                  |             | 7 | None       | 5.7   |

|                  |             |   |                    |       |
|------------------|-------------|---|--------------------|-------|
|                  |             | 8 | None               | 1.6   |
| <b>Patient 6</b> | <b>MuSK</b> |   |                    |       |
|                  |             | 1 | Prednisone         | Naïve |
|                  |             | 2 | Prednisone, Imuran | 1.7   |
|                  |             | 3 | Prednisone, Imuran | 4.6   |
|                  |             | 4 | Prednisone, Imuran | 4.7   |
|                  |             | 5 | Prednisone, Imuran | 8.5   |
| <b>Patient 7</b> | <b>AChR</b> |   |                    |       |
|                  |             | 1 | Prednisone, Imuran | 5.7   |
|                  |             | 2 | Prednisone, Imuran | 7     |
|                  |             | 3 | None               | 24.1  |

**Supplemental Table 5. CAR-T Sample Details**

| <b>CAR-T</b> | <b>Patient</b> | <b>Malignancy</b> | <b>Post-CAR-T<br/>Sample Timing<br/>(weeks)</b> | <b>Prior therapy<br/>(months pre-CAR-<br/>T)</b> | <b>Concurrent<br/>treatment (days<br/>prior to second<br/>sample)</b> |
|--------------|----------------|-------------------|-------------------------------------------------|--------------------------------------------------|-----------------------------------------------------------------------|
| <b>BCMA</b>  |                |                   |                                                 |                                                  |                                                                       |
|              | Patient 1      | MM                | 51                                              | IVIG, 6                                          | IVIG, 117                                                             |
|              | Patient 2      | MM                | 27                                              | IVIG, 4                                          | IVIG, 56                                                              |
|              | Patient 3      | MM                | 30                                              | None                                             | None                                                                  |
|              | Patient 4      | MM                | 61                                              | None                                             | IVIG, 68                                                              |



|             |            |          |    |                   |           |
|-------------|------------|----------|----|-------------------|-----------|
|             | Patient 5  | MM       | 29 | BCMA, 3           | IVIg, 112 |
|             | Patient 6  | MM       | 29 | Daratumumab, 3    | IVIg, 117 |
|             | Patient 7  | MM       | 30 | Daratumumab, 5    | IVIg, 47  |
|             | Patient 8  | MM       | 22 | None              | None      |
|             | Patient 9  | MM       | 22 | None              | None      |
| <b>CD19</b> |            |          |    |                   |           |
|             | Patient 1  | Lymphoma | 33 | Polatuzumab, 1    | None      |
|             | Patient 2  | Lymphoma | 28 | Autologous HCT, 7 | None      |
|             | Patient 3  | Lymphoma | 32 | None              | None      |
|             | Patient 4  | Lymphoma | 36 | None              | None      |
|             | Patient 5  | Lymphoma | 27 | Ibrutinib, 1      | IVIg, 121 |
|             | Patient 6  | Lymphoma | 30 | None              | None      |
|             | Patient 7  | Lymphoma | 29 | None              | IVIg, 59  |
|             | Patient 8  | Lymphoma | 26 | None              | None      |
|             | Patient 9  | Lymphoma | 30 | None              | IVIg, 28  |
|             | Patient 10 | Lymphoma | 35 | Autologous HCT, 8 | None      |
|             | Patient 11 | Lymphoma | 30 | None              | IVIg, 28  |
|             | Patient 12 | Lymphoma | 21 | None              | None      |
|             | Patient 13 | Lymphoma | 27 | None              | None      |
|             | Patient 14 | Lymphoma | 27 | None              | IVIg, 155 |

**Table Legend:** MM=multiple myeloma; Sample timing refers to number of weeks between CAR-T infusion and the post-infusion sample being drawn; Prior therapy lists additional

immunomodulatory therapies given in the year prior to initial sample collection, and the number of months between administration of the therapy and collection of the initial sample, excluding the pre-CAR-T conditioning chemotherapy which consists of cyclophosphamide and fludarabine for every patient; Concurrent treatment lists the number of days prior to the second sample being collected when treatment was administered, only IVIG is listed because no other B cell or antibody modulating therapies were given.

**Supplemental Table 6: Multiplex Bead-based Protein Array Antigen Panel**

| <b>Antigen</b> | <b>Antigen Vendor</b> | <b>Antigen Catalog #</b> |
|----------------|-----------------------|--------------------------|
| IL-1A          | Peprtech              | 200-01A                  |
| IL-2           | Peprtech              | 200-02                   |
| IL-4           | Peprtech              | 200-04                   |
| IL-6           | Peprtech              | 200-06                   |
| IL-7           | Prospec               | CYT-214                  |
| IL-11          | Peprtech              | 200-11                   |
| IL-15          | Peprtech              | 200-15                   |
| IL-17A         | Peprtech              | 200-17                   |
| IL-17F         | Peprtech              | 200-25                   |
| IL-21          | Peprtech              | 200-21                   |
| IL-22          | Peprtech              | 200-22                   |
| IL-23          | Peprtech              | 200-23                   |
| IL-31          | Peprtech              | 200-31                   |

|                                    |                         |                |
|------------------------------------|-------------------------|----------------|
| Influenza A HA (H1)                | Kim Lab -<br>Stanford   | N/A            |
| Haemophilus Influenzae<br>B        | Creative<br>Diagnostics | DAGHIB002      |
| Influenza A HA (H3)                | Kim Lab -<br>Stanford   | N/A            |
| RSV-F Protein                      | Sino                    | 11049-V08B     |
| EBV p18                            | Prospec                 | EBV-273        |
| EBV EA-D                           | MyBioSource             | MBS319448      |
| HAV VP1                            | Creative<br>Diagnostics | DAG2415        |
| EBV EBNA-1                         | Abcam                   | ab138345       |
| EBV EA                             | Prospec                 | EBV-272        |
| HBsAg                              | MyBioSource             | MBS142509      |
| Varicella Zoster<br>Glycoprotein E | MyBioSource             | MBS553197      |
| EV71 VP1 Capsid<br>Protein         | BioMART                 | Custom Request |
| Mumps Nucleoprotein                | Prospec                 | MMP-001        |
| Rubella E1                         | Prospec                 | RUB-291        |
| Measles Nucleoprotein              | MyBioSource             | MBS319759      |
| AcmNPV gp64                        | Sino Biological         | 40496-V08B     |
| Rhinovirus VP1                     | MyBioSource             | MBS1220686     |

|                                                  |                 |             |
|--------------------------------------------------|-----------------|-------------|
| Parainfluenza<br>Hemagglutinin-<br>neuraminidase | Sino Biological | 40629-V07B  |
| HSV glycoprotein G                               | MyBioSource     | MBS145445   |
| CMV gB                                           | Prospec         | CMV-211     |
| HMPV Glycoprotein G                              | Sino Biological | 40791-V08H  |
| Anti-Human IgG Fc<br>fragment Specific           | Jackson         | 109-005-008 |
| Anti-Human IgG F(ab')<br>fragment specific       | Jackson         | 109-005-006 |
| Anti-Human IgG (H+L)                             | Jackson         | 109-005-003 |
| Human IgG from serum                             | Sigma           | I4506       |
| PDC-E2                                           | Diarect         | A17901      |
| TPO                                              | Diarect         | A12101      |
| TG                                               | Diarect         | A12201      |
| CXCL10                                           | Peprtech        | 300-12      |
| CXCL9                                            | Peprtech        | 300-26      |
| MIP-1alpha (CCL3)                                | Peprtech        | 300-08      |
| CXCL13                                           | Peprtech        | 300-47      |
| CXCL16                                           | Peprtech        | 300-55      |
| CXCL5                                            | Peprtech        | 300-22      |
| CCL21                                            | Peprtech        | 300-35A     |
| CXCL8                                            | Peprtech        | 200-08      |

|             |                 |                |
|-------------|-----------------|----------------|
| CCL22       | Peprotech       | 300-36         |
| CCL19       | Peprotech       | 300-29B        |
| CCL25       | Peprotech       | 300-45         |
| CXCL17      | Prospec         | CHM-024        |
| IFN-alpha1  | Prospec         | CYT-291        |
| IFN-alpha2  | R&D             | 11101-2        |
| IFN-alpha6  | Origene         | TP760329       |
| IFN-alpha7  | Prospec         | CYT-196        |
| IFN-alpha8  | Sino            | 10347-H08H     |
| IFN-alpha10 | Sino            | 10349-H08H     |
| IFN-beta    | Peprotech       | 300-02BC       |
| IFN-epsilon | R&D             | 9667-ME-025/CF |
| IFN-omega   | Peprotech       | 300-02J        |
| IFN-gamma   | Peprotech       | 300-02         |
| IFN-lambda1 | Peprotech       | 300-02L        |
| IFN-lambda2 | Peprotech       | 300-02K        |
| C3          | Complement Tech | A113           |
| C1q         | EMD             | 204876         |
| FGF7        | Peprotech       | 100-19         |
| GM-CSF      | Peprotech       | 300-03         |
| LIF         | Peprotech       | 300-05         |
| PDGFBB      | Peprotech       | 100-14B        |
| VEGFB       | Peprotech       | 100-20B        |

|              |                 |                |
|--------------|-----------------|----------------|
| TNF-alpha    | Peprotech       | 300-01A        |
| IL1RA        | Peprotech       | 200-01RA       |
| ACE2         | Sino biological | 10108-H05H     |
| Proteinase 3 | Diarect         | A18601         |
| BPI          | Sigma           | SRP6307        |
| IFN-lambda3  | R&D             | 5259-IL-025/CF |
| IL-33        | Peprotech       | 200-33         |
| CCL26        | Peprotech       | 300-48         |

**Supplemental Table 7: Additional BCMA Patient Demographics**

| <b>Patient</b> | <b>Cohort</b> | <b>Age Range (years)</b> | <b>Sex</b> | <b>Race/Ethnicity</b> |
|----------------|---------------|--------------------------|------------|-----------------------|
| Patient 10     | BCMA          | 51-55                    | Female     | White                 |
| Patient 11     | BCMA          | 61-65                    | Male       | White                 |
| Patient 12     | BCMA          | 51-55                    | Male       | Not reported          |
| Patient 13     | BCMA          | 56-60                    | Male       | White                 |

**Supplemental Table 8: Additional BCMA Sample Details**

| <b>CAR-T</b> | <b>Patient</b> | <b>Malignancy</b> | <b>Post-CAR-T<br/>Sample Timing<br/>(weeks)</b> | <b>Prior therapy<br/>(months pre-<br/>CAR-T)</b> | <b>Concurrent<br/>treatment (days<br/>prior to second<br/>sample)</b> |
|--------------|----------------|-------------------|-------------------------------------------------|--------------------------------------------------|-----------------------------------------------------------------------|
| <b>BCMA</b>  |                |                   |                                                 |                                                  |                                                                       |
|              | Patient 10     | MM                | 27                                              | None                                             | None                                                                  |

|  |            |    |    |               |      |
|--|------------|----|----|---------------|------|
|  | Patient 11 | MM | 24 | None          | None |
|  | Patient 12 | MM | 27 | None          | None |
|  | Patient 13 | MM | 22 | Elotuzumab, 4 | None |

**Table Legend:** MM=multiple myeloma; Sample timing refers to number of weeks between CAR-T infusion and the post-infusion sample being drawn; Prior therapy lists additional immunomodulatory therapies given in the year prior to initial sample collection, and the number of months between administration of the therapy and collection of the initial sample, excluding the pre-CAR-T conditioning chemotherapy which consists of cyclophosphamide and fludarabine for every patient.
